# Supplementary material
Source: publisher site journal article supplement (https://www.dovepress.com/article/598637)
Supplement: Supplementary file 1 [file 598637%20Revised%20%252509Supplementary.pdf]

# Supplemental Document 1

## Pain Medicine Program Director Survey

1. In which of the following pain-related subcategories is your program strongest?
  - Anesthesia
  - PM&R
  - Radiology
  - Palliative care
  - Neurology
  - Psychiatry (addiction)
  - Psychology (behavioral medicine)
  - Medical management
  - Basic interventional pain management
  - Advanced interventional pain management
2. Does your program encourage online platforms for supplemental education?
  - Yes
  - No
  - Unsure
3. What online platforms do your fellows use for self-study? (Select all that apply.)
  - YouTube
  - Google Scholar articles
  - Webinars from professional organizations (APPD, ASRA Pain Medicine, AAPM, INS, NANS)
  - Industry-sponsored webinars
  - Industry-sponsored online workshops
  - Do not support online platforms
  - Other (please specify)
4. Does your program allow fellows to participate in industry-related procedural workshops?
  - Yes
  - No
5. How does your program manage trainee participation in industry-based procedural workshops?
  - Encourage
  - Discourage
  - Neither encourage nor discourage
6. Does your program allow fellows to participate in professional society-related procedural workshops?
  - Yes
  - No

7. What is your program's stance on trainee participation in society-based procedural workshops?
  - Encourage
  - Discourage
  - Neither encourage nor discourage
8. How much time do your fellows spend in rotations outside of the pain practice?
  - Less than 1 month
  - 1 month
  - 2 months
  - 3 months
  - More than 3 months
9. Outside rotations are:
  - Longitudinal
  - Chronological
  - Longitudinal and chronological
  - N/A
10. Does your fellowship offer electives?
  - Yes
  - No
11. In what topics do your fellows have the most clinical experience? (Rank from 1, most clinical experience, to 5, least clinical experience)
  - Procedural interventions
  - Multidisciplinary education
  - Surgical procedures
  - Business aspects of pain medicine
  - Scholarly and research activities
12. What characteristics do you look for in a fellow? (Rank from 1, most important, to 12, least important.)
  - Integrity
  - Intelligence
  - Skilled test taker
  - Procedural aptitude
  - Congeniality
  - Multidisciplinary collaboration
  - Professionalism
  - Diligent worker
  - Conscientiousness
  - Empathy
  - Listening skills
  - Cautious

13. What aspects of pain training are the most valuable determinants of long-term success for postgraduate practice? (Rank from 1, most valuable, to 12, least valuable.)

- Integrity
- Intelligence
- Skilled test taker
- Procedural aptitude
- Congeniality
- Multidisciplinary collaboration
- Professionalism
- Diligent worker
- Conscientiousness
- Empathy
- Gritt
- Cautious

14. What advanced procedures do you believe are most important for your fellows to learn during fellowship?

- Lumbar RFA
- Cervical RFA
- SCS trials
- SCS implants
- Interspinous spacer implants
- PNS implants
- SIJ fusion
- Vertebroplasty/kyphoplasty
- mild®
- Basovertebral RFA
- Endoscopic surgeries
- Interspinous fusions
- Intrathecal drug delivery systems
- PRP and stem cell therapies

15. What procedures do you think can be learned after fellowship if formal education is not provided in fellowship? (Select all that apply.)

- Lumbar RFA
- Cervical RFA
- SCS trials
- SCS implants
- Interspinous spacer implants
- PNS implants
- SIJ fusion

- Vertebroplasty/kyphoplasty
  - mild®
  - Basovertebral RFA
  - Endoscopic surgeries
  - Interspinous fusions
  - Intrathecal drug delivery systems
  - PRP and stem cell therapies
  - None of the above
16. Do you think pain fellowships can provide adequate training in all ABA subtopics in a 12-month training program?
- Yes
  - No
  - Unsure
17. In your opinion, how many months beyond the current 12-month training period would be needed to obviate the pursuit of supplemental fellowship training by industry or pain/spine societies?
- 0
  - 1 to less than 3
  - 3 to less than 6
  - 6 to less than 12
  - 12 to less than 18
  - 18 to less than 24
  - 24 or more
18. In your opinion, how many months beyond the current 12-month training period do you feel are needed to limit the need for industry-sponsored education to graduate a fellow that can excel in the independent practice of pain medicine?
- 0
  - 1 to less than 3
  - 3 to less than 6
  - 6 to less than 12
  - 12 to less than 18
  - 18 to less than 24
  - 24 or more
19. Does your program teach or emphasize physician-patient communication skills?
- Yes
  - No
20. Does your program offer any formal teaching in any of the following skills/disciplines? (Select all that apply.)
- Reflective listening
  - Cognitive therapy

- Behavioral therapy
  - Mindfulness-based stress reduction
  - Lifestyle medicine
  - Pain psychology
21. In which of the following disciplines/skills would you like to add formal teaching for your fellows? (Select all that apply.)
- Reflective listening
  - Cognitive therapy
  - Behavioral therapy
  - Mindfulness-based stress reduction
  - Lifestyle medicine
  - Pain psychology
  - None of the above

## **Employer of Pain Physicians Survey**

1. What setting is your practice?
  - Rural
  - Urban
  - Suburban
  - Large city
2. What geographic location in the United States is your practice located?
  - Northeast
  - Southeast
  - Midwest
  - Southwest
  - West
3. In what professional setting do you practice?
  - Academic
  - Private
  - Private with academic partnership
4. Do you consider hiring a new graduate in your practice?
  - Yes
  - No
5. Have you hired newly graduated pain fellows in the last 10 years?
  - Yes
  - No
6. How long does it generally take to train a new post-graduate hire to practice independently in your practice?
  - Less than one month

- 1–6 months
  - 6–12 months
  - More than 12 months
7. Which qualities are important to you when considering a candidate for a position in your practice? (*Rate each as Very important / Somewhat important / Not important*)
- Bedside manner and empathy
  - Communication skills
  - Clinic and procedural efficiency
  - Professionalism
  - Billing/coding experience and knowledge of business or healthcare operations
8. Do you believe qualities such as bedside manner and empathy can be learned during fellowship?
- I believe it is an innate skill that cannot be learned.
  - I believe some components can be learned and some are innate.
  - I believe it is a skill that can be fully learned during fellowship.
9. How important is each of the following when considering a candidate for a position in your practice? (*Rate each as Very important / Somewhat important / Not important*)
- Basic interventional procedures
  - Advanced interventional procedures
  - Medication management
  - Institutional reputation and program specialty affiliation (Anesthesiology, PM&R, Neurology)
  - Acute pain medicine exposure
10. What advanced procedures do you believe are most important for a fellow to be comfortable with after fellowship? (*Rate each as Very important / Somewhat important / Not important*)
- Spinal cord stimulation (SCS) trials
  - Implantable devices (SCS implants, PNS implants, interspinous spacers)
  - Percutaneous procedures requiring access to the vertebral body (vertebroplasty, kyphoplasty, basivertebral RFA)
  - *mild*® procedure
  - Fusion procedures (SI joint and interspinous fusions)
  - Regenerative medicine (PRP and stem cell therapies)
  - Endoscopic surgeries
11. Do you feel that most fellows are well trained for independent practice in the following areas? (*Answer Yes or No*)
- Medial branch blocks (MBB) and radiofrequency ablation (RFA)
  - Implants

- Injections
  - Medical management
  - Billing and coding
  - Psychological and behavioral aspects of pain treatment
12. Would you consider a candidate if they were not procedurally trained during fellowship?
- Yes
  - No
13. How would you rate United States pain fellowships regarding preparation of young doctors to join faculty or private practice?
- They are very well prepared.
  - They are prepared but need additional training within our practice.
  - They are not well prepared and require additional training from both current staff and industry.
  - They are not prepared, and fellowships are failing to adequately educate trainees in most settings.

## **Trainee Survey Questions**

1. What is your primary specialty?
  - Anesthesia
  - Physical Medicine & Rehabilitation
  - Neurology
  - Psychiatry
  - Emergency Medicine
  - General Medicine
  - Other (please specify)
2. What is your level of training?
  - Fellow
  - Resident
3. What is your career goal after completing pain fellowship?
  - Private practice
  - Start own clinical practice
  - Academic clinician
  - Researcher
4. How important is each of the following when considering a pain fellowship?
  - Basic interventional procedures
  - Advanced interventional procedures
  - Medication management
  - Institutional reputation

- Research focus
  - Practice management
  - Program geographic location
  - Program specialty affiliation (anesthesia, PMR, neurology)
  - Acute pain medicine exposure
5. What advanced procedures do you believe are most important for you to learn in fellowship?
- SCS Trials
  - SCS Implants
  - Interspinous spacer implants
  - PNS implants
  - SIJ fusion
  - Vertebroplasty/kyphoplasty
  - mild®
  - Basovertebral RFA
  - Endoscopic surgeries
  - Interspinous fusions
  - Intrathecal drug delivery systems
  - PRP and stem cell therapies
6. What advanced procedures do you think you can learn after fellowship, if not taught in fellowship? (Select all that apply.)
- Lumbar RFA
  - Cervical RFA
  - SCS trials
  - SCS implants
  - Interspinous spacer implants
  - PNS implants
  - SIJ fusion
  - Vertebroplasty/kyphoplasty
  - mild®
  - Basovertebral RFA
  - Endoscopic surgeries
  - Interspinous fusions
  - Intrathecal drug delivery systems
  - PRP and stem cell therapies
7. In order of importance, rank where you would most prefer to learn advanced procedures.
- Fellowship
  - Industry events
  - Society based workshops

8. Would you apply to a pain medicine fellowship if procedures were not part of the educational curriculum?
  - Yes
  - No
  - Unsure
9. Would you apply to a pain medicine fellowship if it was extended to two years and advanced procedures were part of the curriculum?
  - Yes
  - No
  - Unsure
10. Would you prefer a pain fellowship that was 2 years in duration, but provided exposure to a wide range of advanced procedures?
  - Yes
  - No
  - Unsure
11. In order of importance, please indicate what you believe are the most valuable reasons for completing a pain medicine fellowship.
  - Improving the opioid crisis
  - Understanding and diagnosing painful conditions
  - High salary potential
  - Learning pharmaceutical pain management
  - Application of a holistic approach to the chronic pain sufferer
  - Performing interventional procedures to improve pain
  - Becoming a leader in the field of pain medicine in a non-academic center
  - Becoming a leader in the field of pain medicine in an academic center
  - Differentiating myself from my primary specialty
  - Improving lifestyle relative to my primary specialty
  - Ability to create a practice model of continuity of care
  - Engineering new pain therapies
12. What characteristics do you think program directors value most in selecting a pain fellow? (Rank from 1, most important, to 12, least important.)
  - Integrity
  - Intelligence
  - Skilled test taker
  - Procedural aptitude
  - Congeniality
  - Multidisciplinary collaboration
  - Professionalism
  - Diligent worker
  - Conscientiousness

- Empathy
- Listening skills
- Cautious
